# Supplementary material for: Towards a values framework for integrated health services: an international Delphi study
Source: PubMed Central journal article supplement (PMC7079447; doi:10.1186/s12913-020-5008-y), 2020-03-18
Supplement: 12913_2020_5008_MOESM1_ESM.pdf [file 12913_2020_5008_MOESM1_ESM.pdf]

**Delphi study 1 design - a set of values underpinning integrated care**

| Delphi Study Round 1                            |                                                                      |                                                                                |                    |                  |         |           |
|-------------------------------------------------|----------------------------------------------------------------------|--------------------------------------------------------------------------------|--------------------|------------------|---------|-----------|
| Input:                                          | #                                                                    | Question                                                                       | Answer options     | Decision         |         |           |
| List of values resulting from literature review | <i>Per value:</i>                                                    |                                                                                |                    |                  |         |           |
|                                                 | 1                                                                    | Does this value underpin integrated care?                                      | No                 | > 50%            | ➔       | Exclusion |
|                                                 |                                                                      |                                                                                | Yes                | > 80%            | ➔       | Inclusion |
|                                                 |                                                                      |                                                                                | > Explanation      | Remaining values | ➔       | Round 2   |
|                                                 | 2                                                                    | Suggestions for possible rephrase                                              | [Open]             | Analysis         | ➔       | Round 2   |
|                                                 | 3                                                                    | When 'yes' at Q1: On which is this value relevant (multiple answers possible)? | Personal level     |                  | ➔       | Stats     |
|                                                 |                                                                      |                                                                                | Professional level |                  | ➔       | Stats     |
|                                                 |                                                                      |                                                                                | Management level   |                  | ➔       | Stats     |
|                                                 |                                                                      |                                                                                | System level       |                  | ➔       | Stats     |
|                                                 | <i>Closing question:</i>                                             |                                                                                |                    |                  |         |           |
| 4                                               | Would you like to add any value(s) that may be missing in this list? | [Open]                                                                         | Analysis           | ➔                | Round 2 |           |

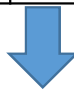

| Delphi Study Round 2                         |                                                                      |                                                                                |                                                         |                                                   |         |           |
|----------------------------------------------|----------------------------------------------------------------------|--------------------------------------------------------------------------------|---------------------------------------------------------|---------------------------------------------------|---------|-----------|
| Input:                                       | #                                                                    | Question                                                                       | Answer options                                          | Decision                                          |         |           |
| List of values resulting from Delphi round 1 | <i>Per value:</i>                                                    |                                                                                |                                                         |                                                   |         |           |
|                                              | 1                                                                    | Does this value underpin integrated care?                                      | No                                                      | > 50%                                             | ➔       | Exclusion |
|                                              |                                                                      |                                                                                | Yes                                                     | > 80%                                             | ➔       | Inclusion |
|                                              |                                                                      |                                                                                |                                                         | Remaining values                                  | ➔       | Round 3   |
|                                              | 2                                                                    | Suggestions for possible rephrase                                              | [Open]                                                  | Analysis by research team and possible rephrasing | ➔       | Round 3   |
|                                              | 3                                                                    | When 'yes' at Q1: On which is this value relevant (multiple answers possible)? | Personal level                                          |                                                   | ➔       | Stats     |
|                                              |                                                                      |                                                                                | Professional level                                      |                                                   | ➔       | Stats     |
|                                              |                                                                      |                                                                                | Management level                                        |                                                   | ➔       | Stats     |
|                                              |                                                                      |                                                                                | System level                                            |                                                   | ➔       | Stats     |
|                                              | <i>Closing question:</i>                                             |                                                                                |                                                         |                                                   |         |           |
| 4                                            | Would you like to add any value(s) that may be missing in this list? | [Open]                                                                         | Analysis by research team and possible addition to list | ➔                                                 | Round 3 |           |

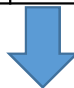

| Delphi Study Round 3                         |                   |                                           |                |                  |   |           |
|----------------------------------------------|-------------------|-------------------------------------------|----------------|------------------|---|-----------|
| Input:                                       | #                 | Question                                  | Answer options | Decision         |   |           |
| List of values resulting from Delphi round 2 | <i>Per value:</i> |                                           |                |                  |   |           |
|                                              | 1                 | Does this value underpin integrated care? | No             | > 50%            | ➔ | Exclusion |
|                                              |                   |                                           | Yes            | > 80%            | ➔ | Inclusion |
|                                              |                   |                                           | > Explanation  | Remaining values | ➔ | Exclusion |
|                                              | 2                 | Suggestions for possible rephrase         | [Open]         | Analysis         | ➔ | Def.list  |

|                          |                                                                                |                    |          |                                                                                     |          |
|--------------------------|--------------------------------------------------------------------------------|--------------------|----------|-------------------------------------------------------------------------------------|----------|
| 3                        | When 'yes' at Q1: On which is this value relevant (multiple answers possible)? | Personal level     |          |  | Stats    |
|                          |                                                                                | Professional level |          |  | Stats    |
|                          |                                                                                | Management level   |          |  | Stats    |
|                          |                                                                                | System level       |          |  | Stats    |
| <i>Closing question:</i> |                                                                                |                    |          |                                                                                     |          |
| 4                        | Would you like to add any value(s) that may be missing in this list?           | [Open]             | Analysis |  | Def.list |
